# Supplementary material
Source: PubMed Central journal article supplement (PMC3544202)
Supplement: NIHMS410538-supplement-1_si_001.pdf [file NIHMS410538-supplement-1_si_001.pdf]

# Supporting Information

## Semi-quantification of ATP in Live Cells using Nonspecific Desorption of DNA from Graphene Oxide as the Internal Reference

*Xiaohong Tan, Tao Chen, Xiangling Xiong, Ye Mao, Guizhi Zhu, Emir Yasun,  
Chunmei Li, Zhi Zhu, Weihong Tan\**

Molecular Science and Biomedicine Laboratory, State Key Laboratory of Chemo/Bio-Sensing and Chemometrics, College of Biology and College of Chemistry and Chemical Engineering, Hunan University, Changsha, 410082, P. R. China; Center For Research at Bio/nano Interface, Department of Chemistry and Department of Physiology and Functional Genomics, Shands Cancer Center, UF Genetics Institute and McKnight Brain Institute, University of Florida, Gainesville, FL, USA

E-mail: [tan@chem.ufl.edu](mailto:tan@chem.ufl.edu)  
Phone and fax: 352 846 2410

### Supporting Figures

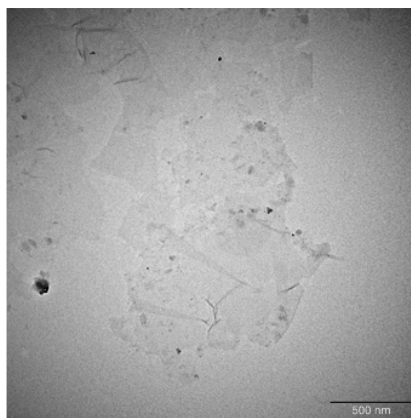

**Figure S1. TEM image of GO.**

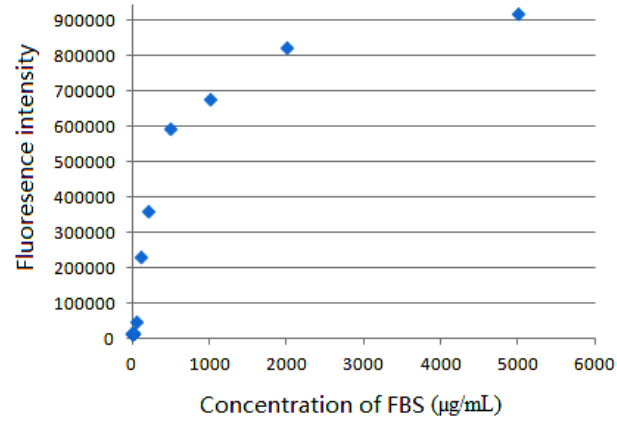

**Figure S2.** Fluorescence intensity of FAM-labeled ssDNA library/GO complex in the presence of different concentrations of FBS. Excitation: 480 nm, and emission: 520 nm.

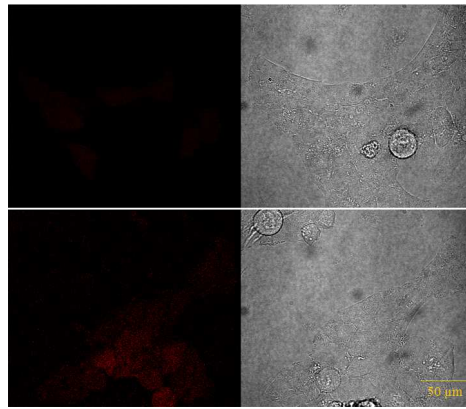

**Figure S3.** Confocal microscopy of HeLa cells treated with ATP aptamer/GO under two conditions: 1) culture medium contained 10% FBS (A, B) and 2) serum-free medium (C, D). Bright-field images are on the right, and fluorescence images are on the left.

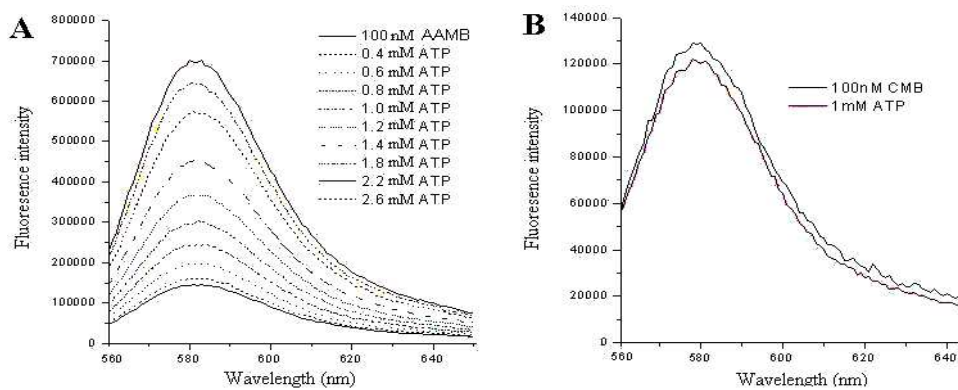

**Figure S4.** Fluorescence spectra of (A) AAMB and AAMB + ATP; (B) CMB and CMB + ATP. Excitation: 565 nm.

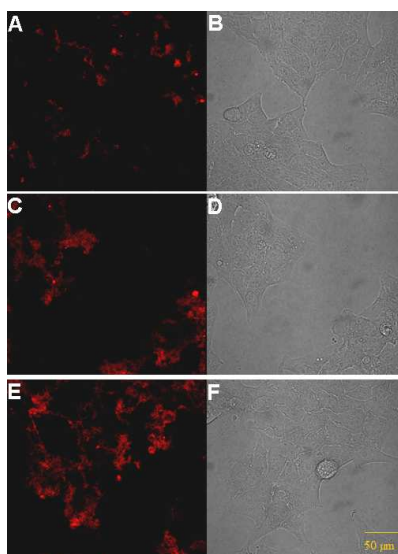

**Figure S5. Confocal fluorescence microscopy of HeLa cells treated with AAMB/GO at different concentrations of GO. A, B) 1.25; C, D) 2.5; E, F) 5.0 µg/mL. The concentration of AAMB was 200 nM in all cases.**

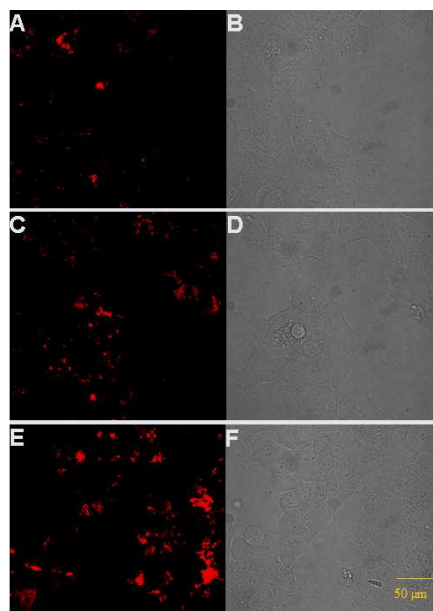

**Figure S6. Confocal fluorescence microscopy of HeLa cells treated with AAMB/GO for 3 h and after further different incubation times. A, B) 2h; C, D) 4h; E, F) 8h.**

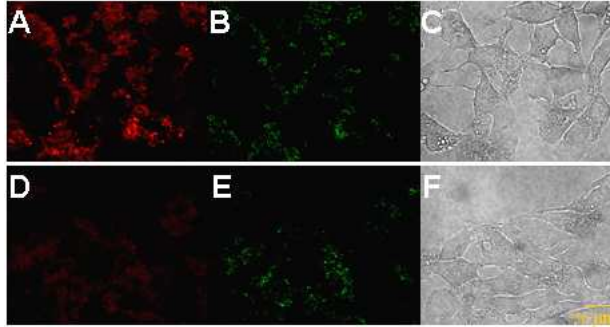

**Figure S7. Confocal microscopy of HeLa cells. Cells were treated with AAMB-internal reference/GO (A, B, C) or CMB-internal reference/GO (D, E, F). A, D) fluorescence images of AAMB or CMB; B, E) fluorescence images of internal reference; C, F) bright-field images.**
